# Supplementary material for: Preparation of a g-C3N4/Co3O4/Ag2O ternary heterojunction nanocomposite and its photocatalytic activity and mechanism
Source: Royal Society of Chemistry journal article supplement (doi:10.1039/d0nj01122c), 2020-01-01
Supplement: d0nj01122c1.pdf [file d0nj01122c1.pdf]

## Preparation of g-C<sub>3</sub>N<sub>4</sub>/Co<sub>3</sub>O<sub>4</sub>/Ag<sub>2</sub>O ternary nanocomposites and its photocatalytic activity and mechanism

Qian Xu, Peng Zhao, Yu-Kun Shi, Jian-Sheng Li\*, Wan-Sheng You, Lan-Cui Zhang and Xiao-Jing Sang\*

School of Chemistry and Chemical Engineering, Liaoning Normal University, Dalian 116029, China

E-mail: lijiansheng@lnnu.edu.cn; sangxj923@lnnu.edu.cn

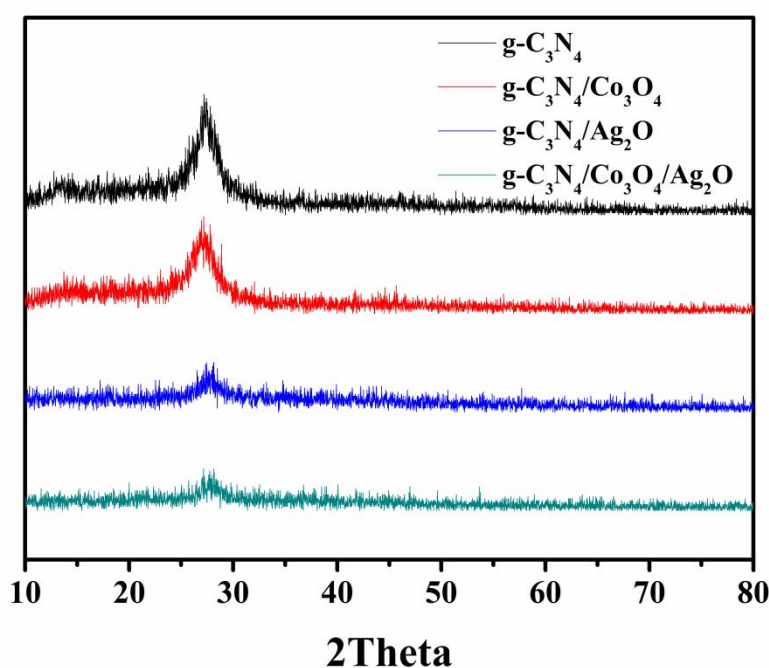

Fig. S1 XRD patterns of g-C<sub>3</sub>N<sub>4</sub>, g-C<sub>3</sub>N<sub>4</sub>/Co<sub>3</sub>O<sub>4</sub>, g-C<sub>3</sub>N<sub>4</sub>/Ag<sub>2</sub>O, g-C<sub>3</sub>N<sub>4</sub>/Co<sub>3</sub>O<sub>4</sub>/Ag<sub>2</sub>O samples.

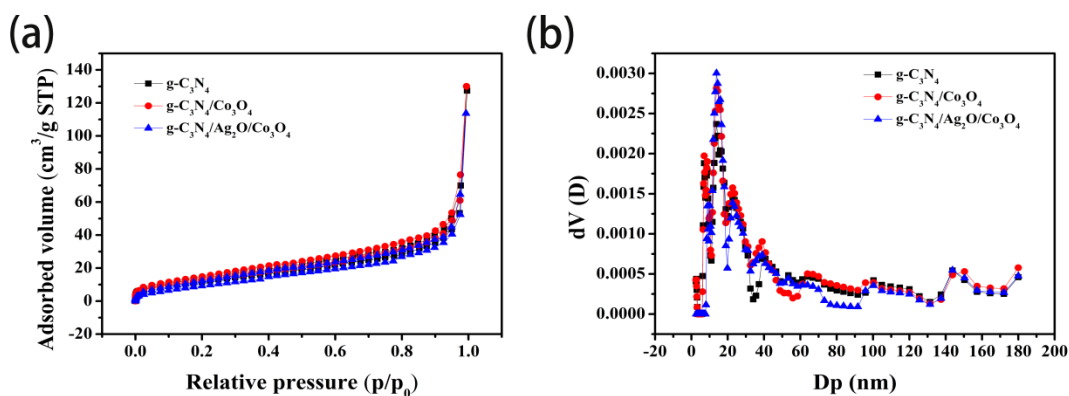

Fig. S2 BET analysis of g-C<sub>3</sub>N<sub>4</sub>, g-C<sub>3</sub>N<sub>4</sub>/Co<sub>3</sub>O<sub>4</sub>, g-C<sub>3</sub>N<sub>4</sub>/Co<sub>3</sub>O<sub>4</sub>/Ag<sub>2</sub>O samples.

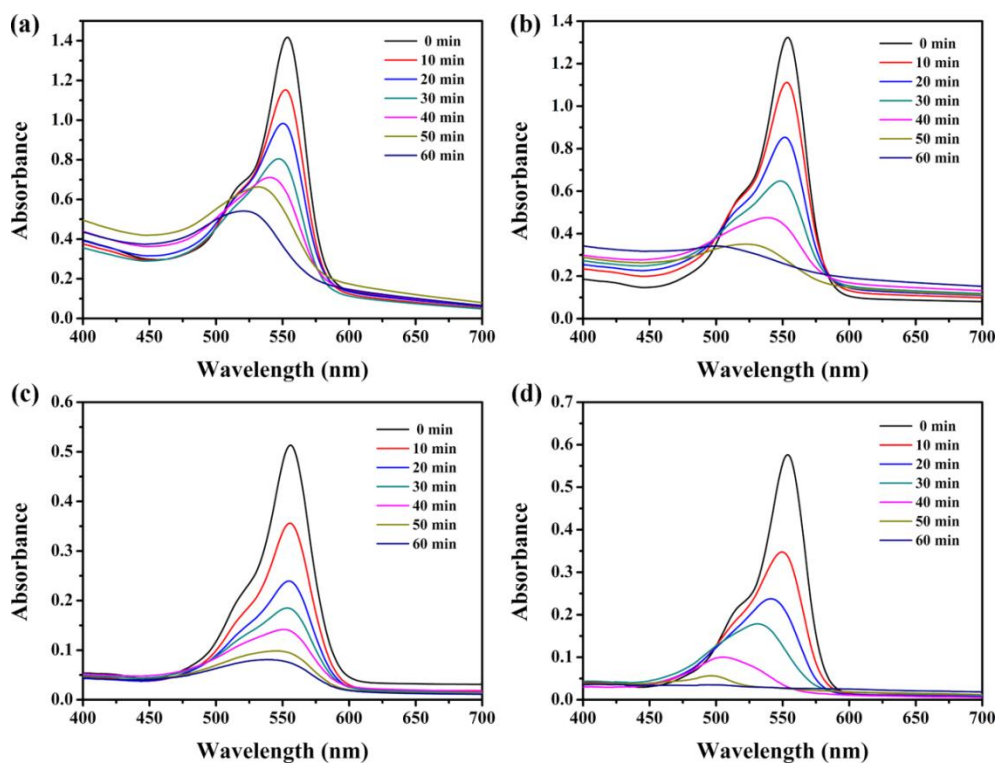

**Fig. S3** UV-Vis absorption spectra of RhB during photodegradation over (a)  $g\text{-C}_3\text{N}_4$ , (b)  $\text{C}_3\text{N}_4/\text{Co}_3\text{O}_4$ , (c)  $g\text{-C}_3\text{N}_4/\text{Ag}_2\text{O}$ , (d)  $g\text{-C}_3\text{N}_4/\text{Co}_3\text{O}_4/\text{Ag}_2\text{O}$  samples.

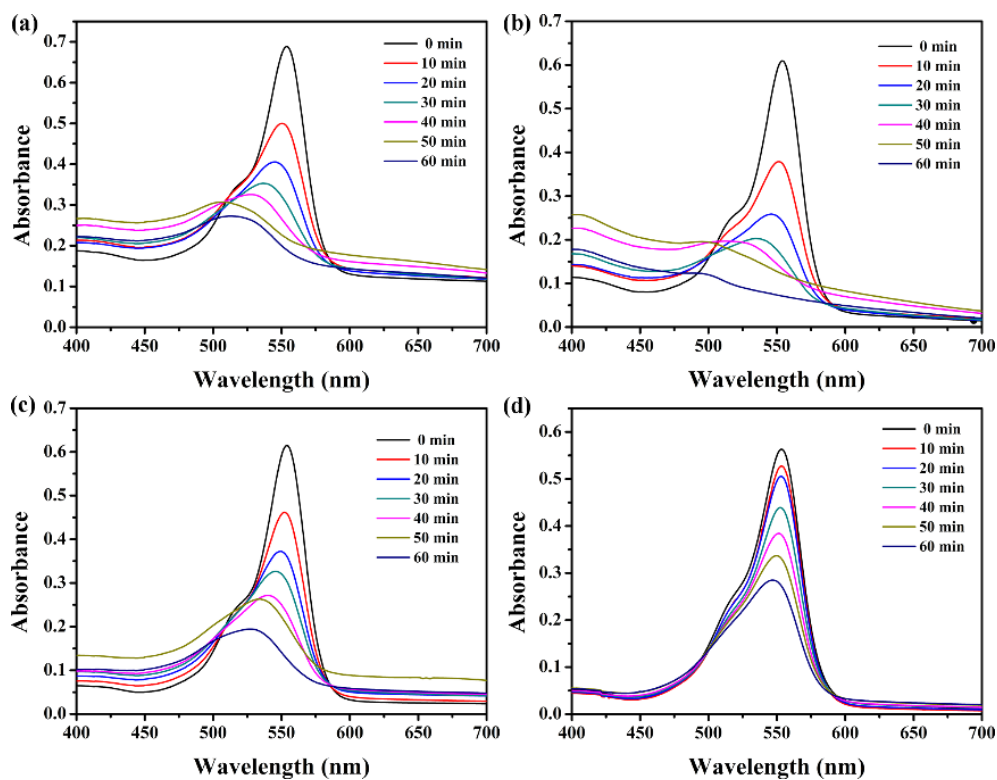

**Fig. S4** UV-Vis absorption spectra of RhB during photodegradation over (a)  $g\text{-C}_3\text{N}_4/\text{Co}_3\text{O}_4/\text{Ag}_2\text{O-0.05}$ , (b)  $g\text{-C}_3\text{N}_4/\text{Co}_3\text{O}_4/\text{Ag}_2\text{O-0.1}$ , (c)  $g\text{-C}_3\text{N}_4/\text{Co}_3\text{O}_4/\text{Ag}_2\text{O-0.5}$  and (d)  $g\text{-C}_3\text{N}_4/\text{Co}_3\text{O}_4/\text{Ag}_2\text{O-1}$  samples.

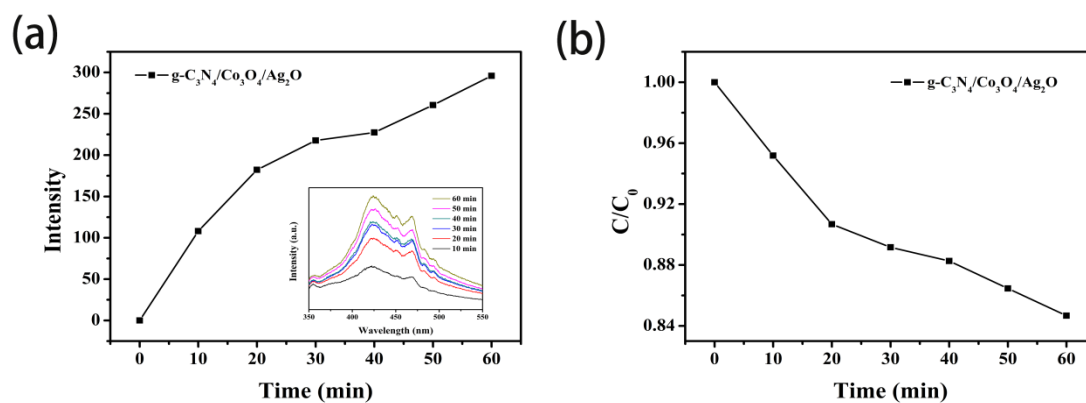

**Fig. S5** (a) PL spectra of  $g\text{-C}_3\text{N}_4/\text{Co}_3\text{O}_4/\text{Ag}_2\text{O}$  sample in 2 mM NaOH solution in the presence of 0.5 mM terephthalic acid under visible-light irradiation and (b) the concentration evolution of NBT during irradiating  $g\text{-C}_3\text{N}_4/\text{Co}_3\text{O}_4/\text{Ag}_2\text{O}$  system.

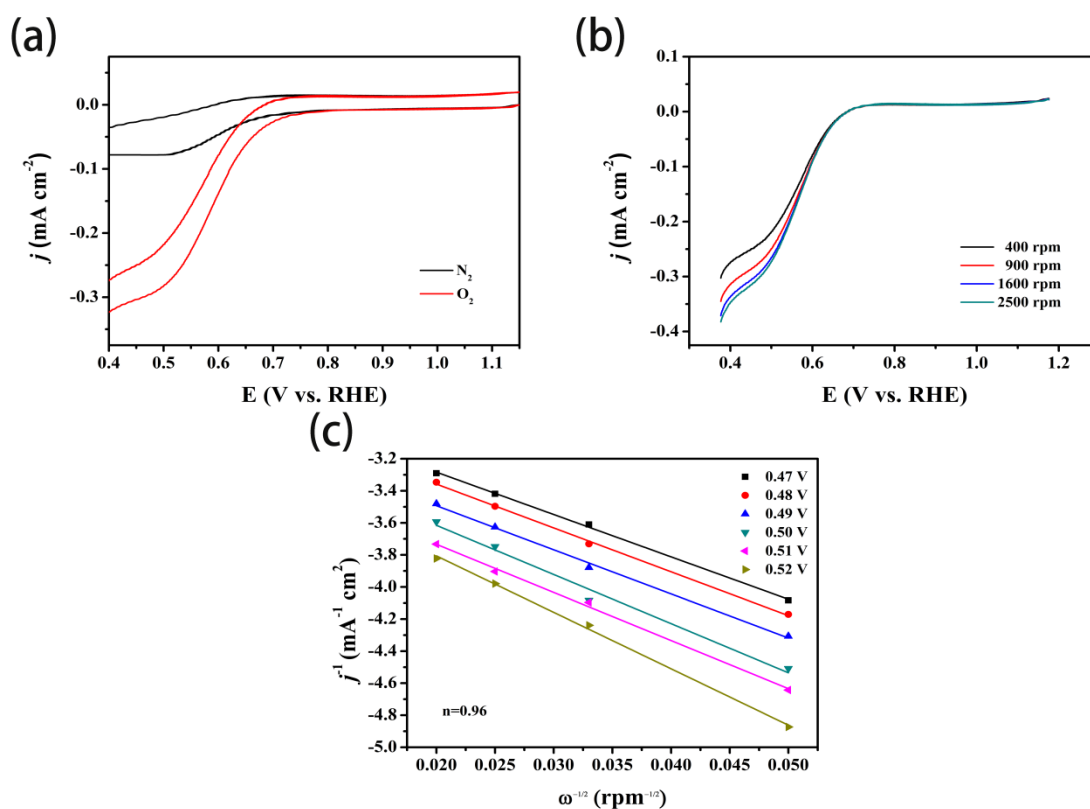

**Fig. S6** (a) Cyclic voltammetry of  $g\text{-C}_3\text{N}_4$ , (b) LSV curves of  $g\text{-C}_3\text{N}_4$  at different rotation rates in  $\text{O}_2$ -saturated 0.1M KOH, (c) K-L plots of  $g\text{-C}_3\text{N}_4$  at various potentials (0.47–0.52 V).

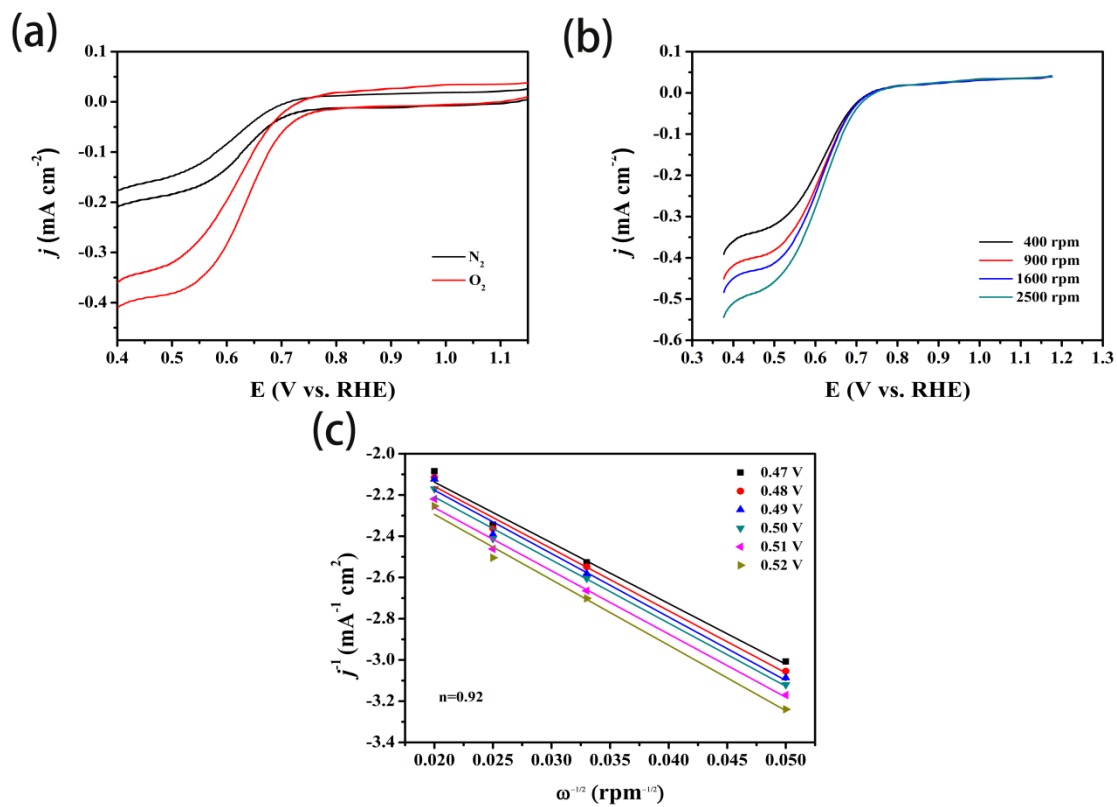

**Fig. S7** (a) Cyclic voltammetry of g-C<sub>3</sub>N<sub>4</sub>/Co<sub>3</sub>O<sub>4</sub>, (b) LSV curves of g-C<sub>3</sub>N<sub>4</sub>/Co<sub>3</sub>O<sub>4</sub> at different rotation rates in O<sub>2</sub>-saturated 0.1M KOH, (c) K-L plots of g-C<sub>3</sub>N<sub>4</sub>/Co<sub>3</sub>O<sub>4</sub> at various potentials (0.47–0.52 V).

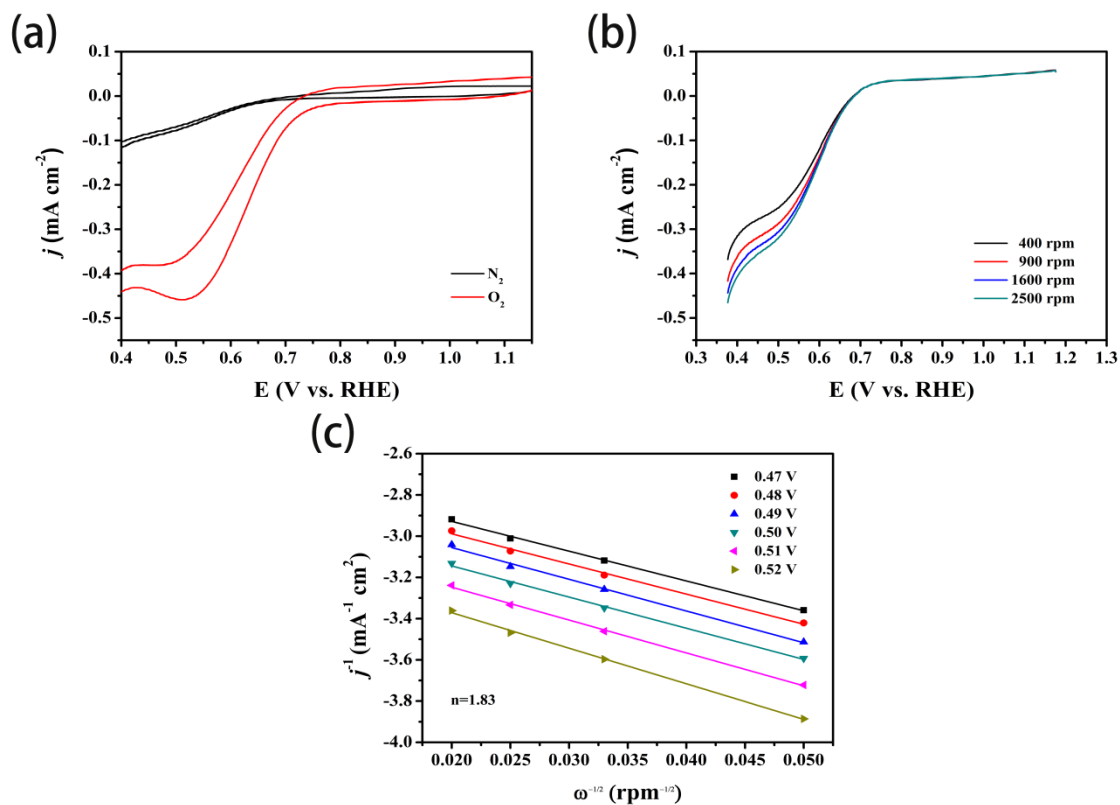

**Fig. S8** (a) Cyclic voltammetry of g-C<sub>3</sub>N<sub>4</sub>/Ag<sub>2</sub>O, (b) LSV curves of g-C<sub>3</sub>N<sub>4</sub>/Ag<sub>2</sub>O at different rotation rates in O<sub>2</sub>-saturated 0.1M KOH, (c) K–L plots of g-C<sub>3</sub>N<sub>4</sub>/Ag<sub>2</sub>O at various potentials (0.47–0.52 V).

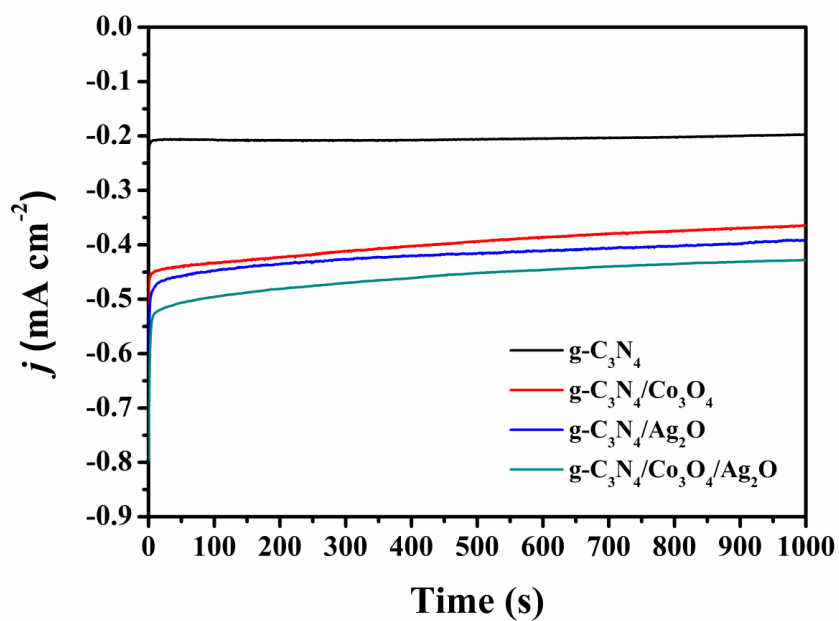

**Fig. S9** Chronoamperometric responses at 0.6 V of g-C<sub>3</sub>N<sub>4</sub> electrodes in O<sub>2</sub>-saturated 0.1 M KOH.

**Table S1 Optical properties of g-C<sub>3</sub>N<sub>4</sub>, Co<sub>3</sub>O<sub>4</sub> and Ag<sub>2</sub>O semiconductors vs. SHE** <sup>[S1, S2]</sup>

| Semiconductor                                                   | E <sub>g</sub> (eV) | E <sub>CBM</sub> (eV) | E <sub>VBM</sub> (eV) |
|-----------------------------------------------------------------|---------------------|-----------------------|-----------------------|
| g-C <sub>3</sub> N <sub>4</sub> /Co <sub>3</sub> O <sub>4</sub> | 2.68                | -0.50                 | 2.18                  |
| Ag <sub>2</sub> O                                               | 1.2                 | 0.20                  | 1.40                  |

**References**

[S1] H. Y. Zhang, W. J. Tian, L. Zhou, H. Q. Sun, M. Tade and S. B. Wang, *Appl. Catal. B: Environ.*, 2018, **223**, 2-9.

[S2] M. Xu, L. Han and S. J. Dong, *ACS Appl. Mater. Interfaces*, 2013, **5**, 12533-12540.
